# Supplementary material for: The Snapdragon LATE ELONGATED HYPOCOTYL Plays A Dual Role in Activating Floral Growth and Scent Emission
Source: MDPI journal article supplement (doi:10.3390/cells8080920), 2019-08-17
Supplement: s1 [file s1]

Supplementary files. Terry et al., “The snapdragon LATE ELONGATED HYPOCOTYL plays a dual role in activating floral growth and scent emission”

**Supplementary Figure S1.** Multiple sequence alignment of the predicted AmLHY and other proteins belonging to the LHY/CCA1 family. Vu (*Vigna unguiculata*), Vr (*Vigna radiata*), Pv (*Pisum vulgaris*), Gm (*Glycine max*), At (*Arabidopsis thaliana*), Na (*Nicotiana attenuata*), Ns (*Nicotiana sylvestris*), Ph (*Petunia hybrida*), Am (*Antirrhinum majus*), Amt (*Amborella trichopoda*), Zm (*Zea mays*), Os (*Oryza sativa*), Hv (*Hordeum vulgare*), Pp (*Physcomitrella patens*), Ot (*Ostreococcus tauri*).

**Supplementary Figure S2.** AtLHY and AmLHY protein alignment.

**Supplementary Figure S3.** Floral parameters in non-transgenic (WT) and transgenic lines (*RNAi:AmLHY*). Asterisk (\*) denotes significant differences among wild type and transgenic flowers (see Supplementary Table S4).

**Supplementary Figure S4.** 24-h scent profile. Major (A) and minor compounds (B) of wild-type, RNAi lines and its average are represented in bars.

**Supplementary Figure S5.** Total volatile amounts, expressed as area divided by flower fresh weight, of wild type (WT) and transgenic lines (*RNAi:AmLHY*).

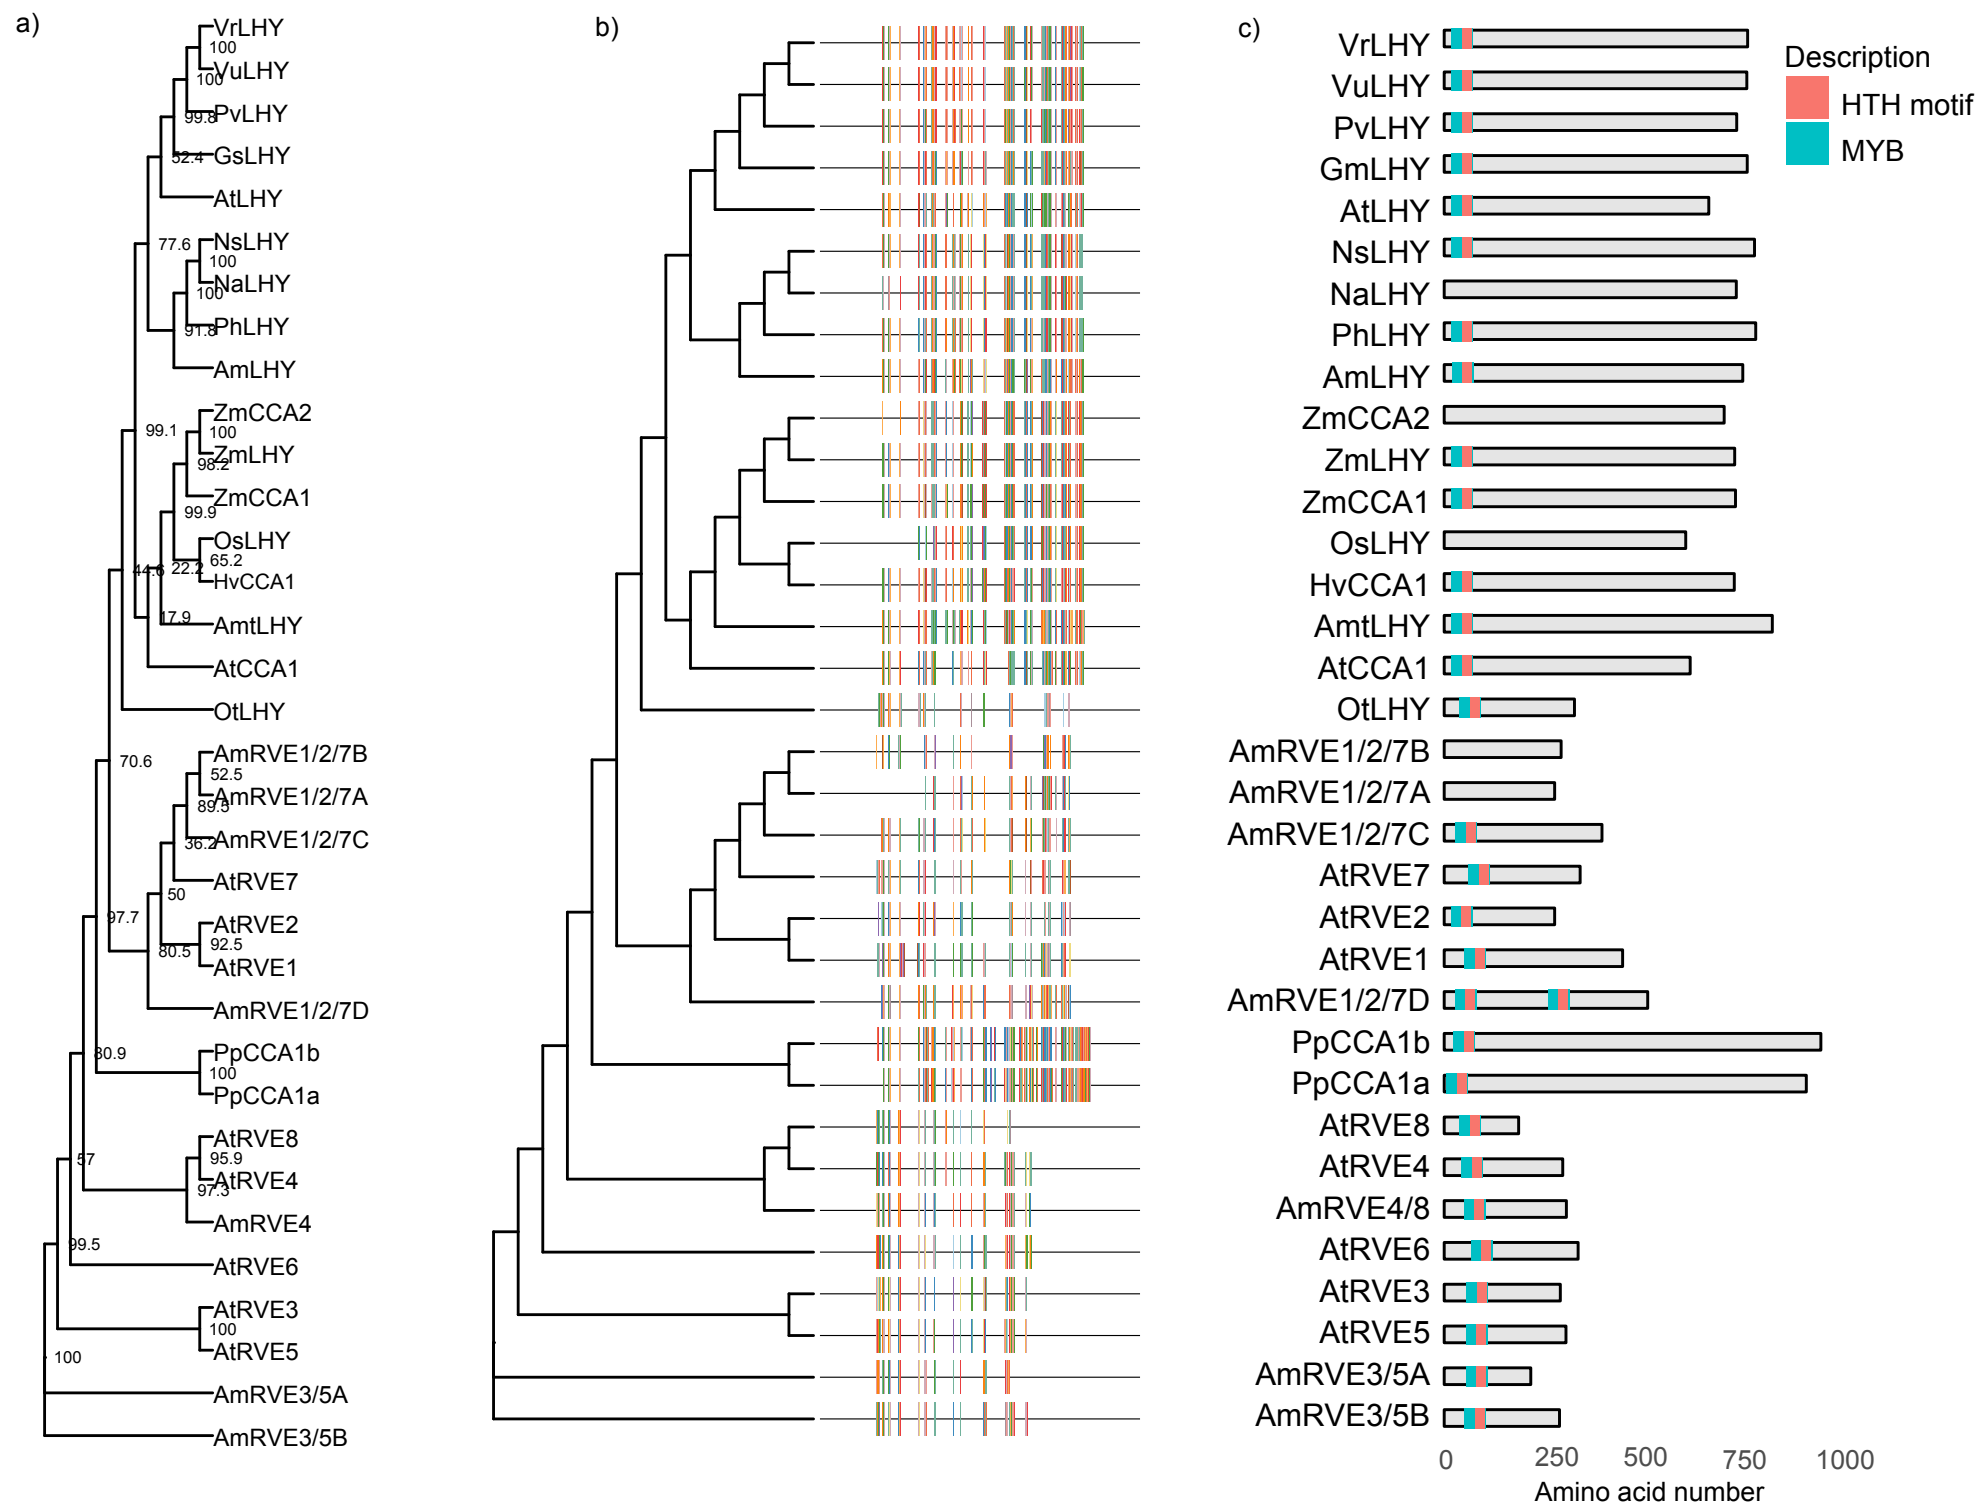

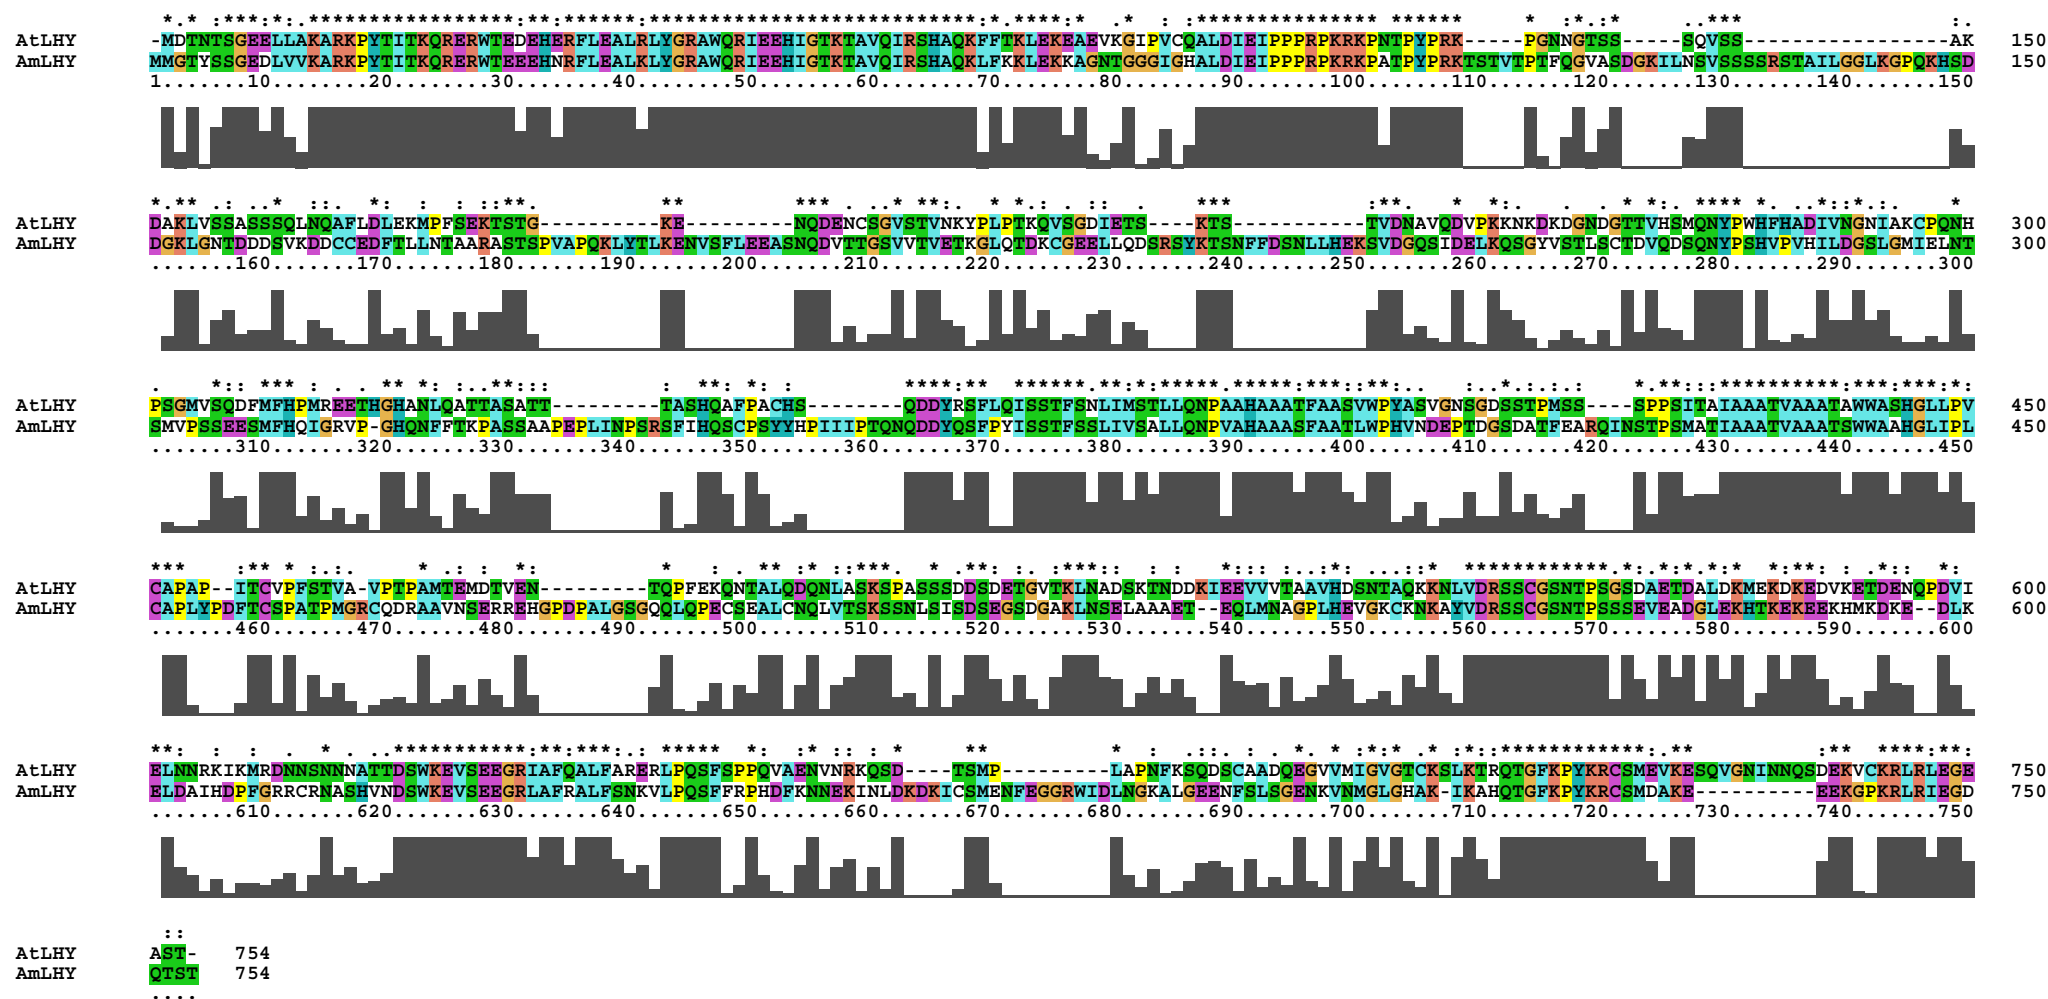

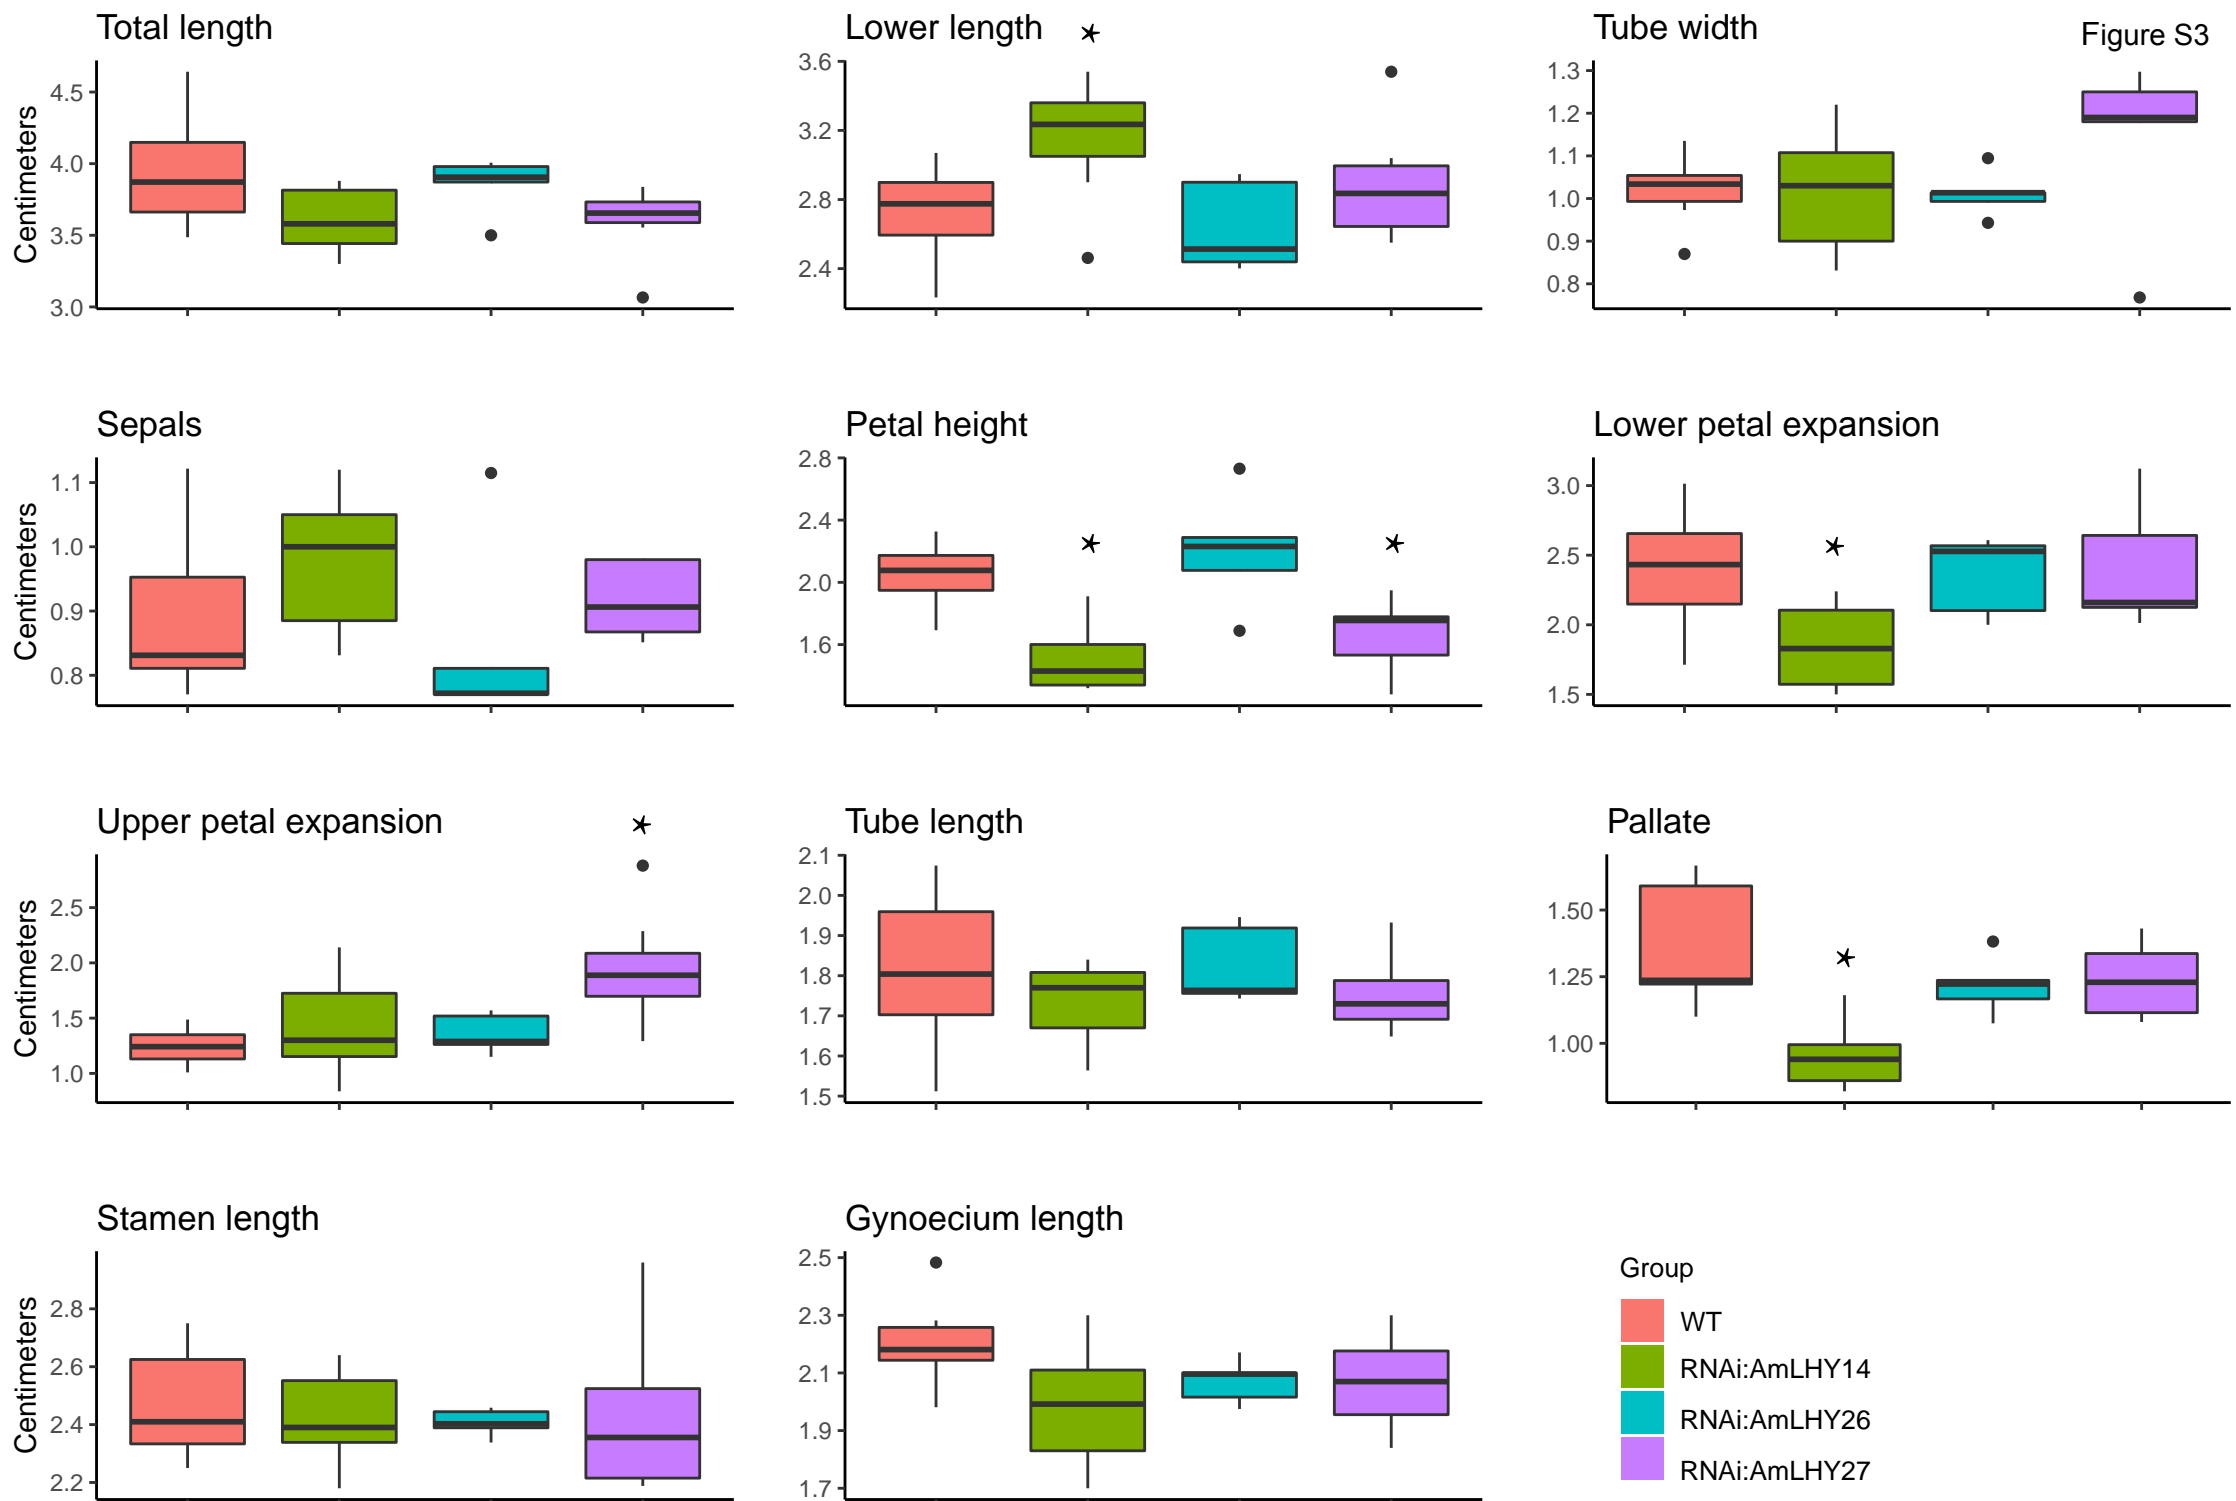

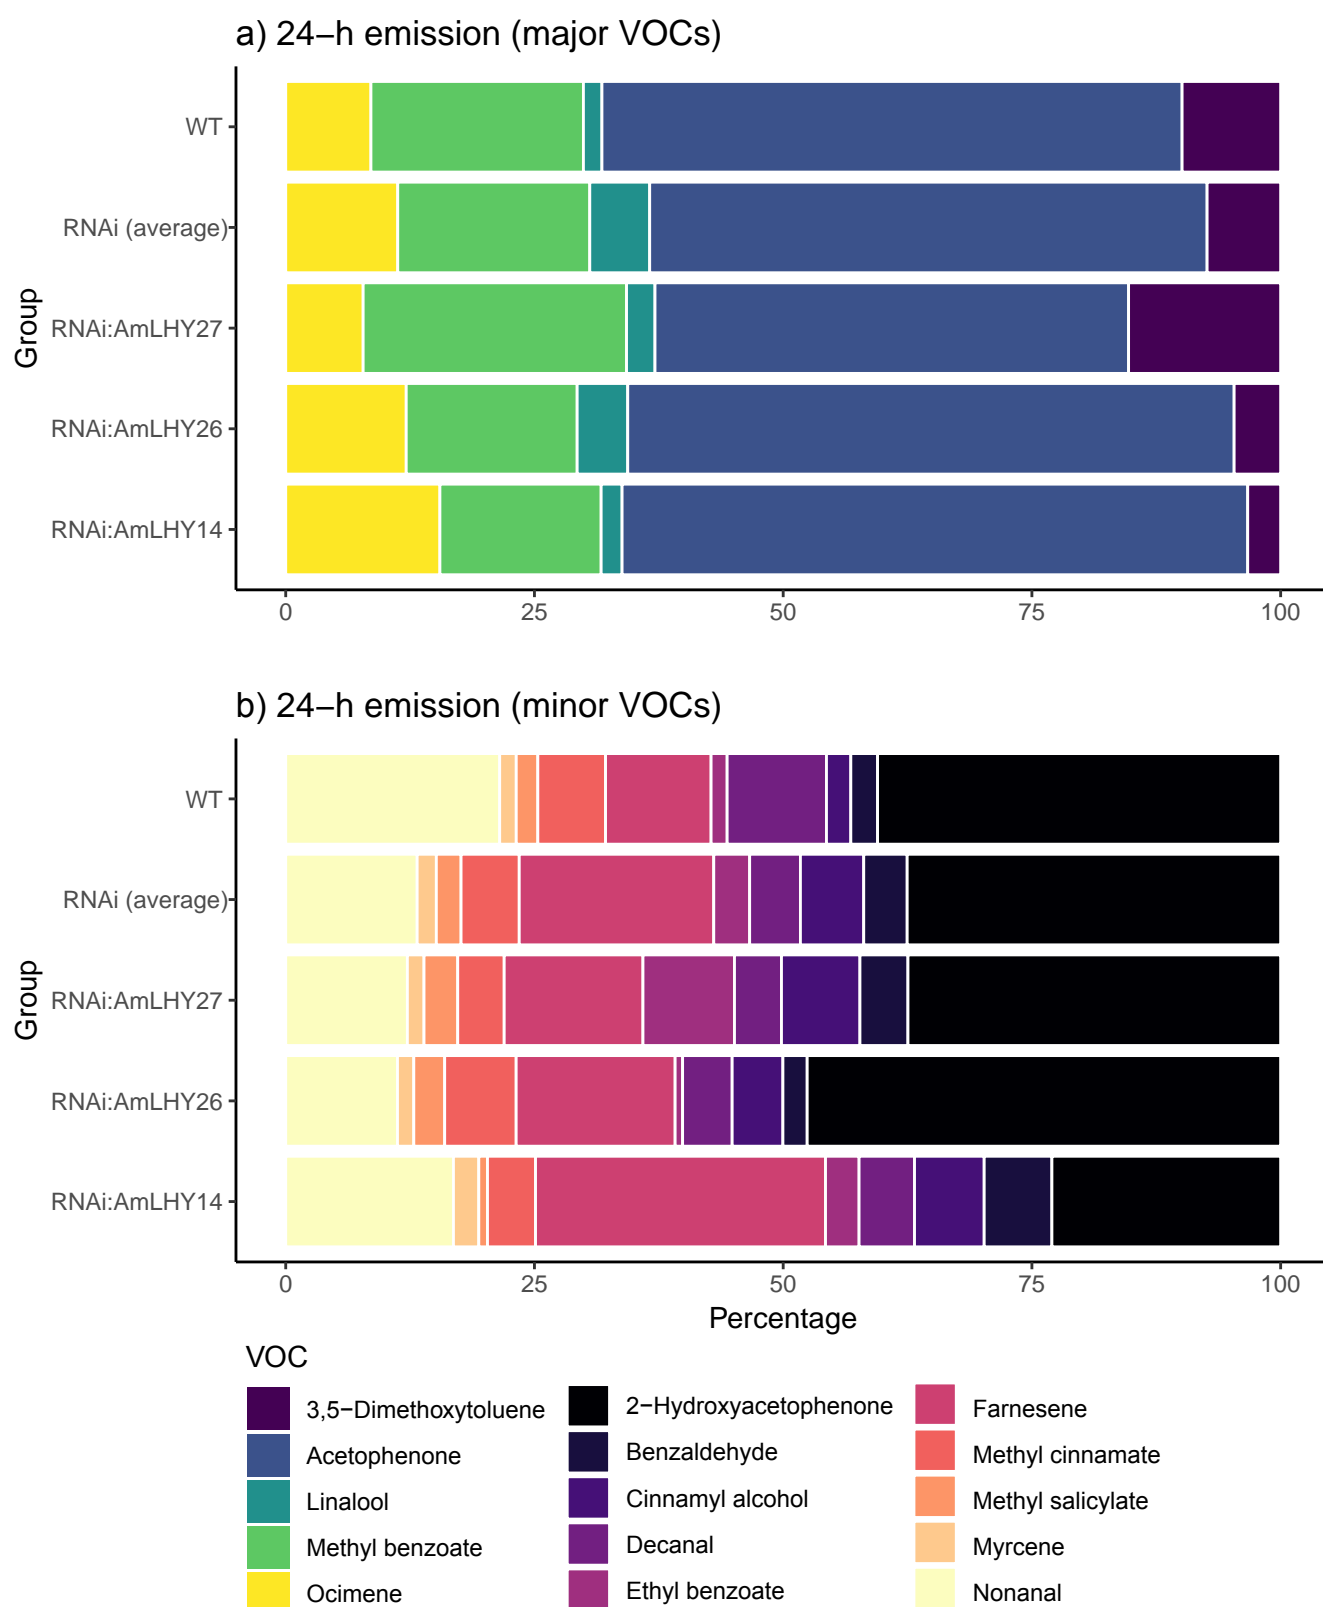

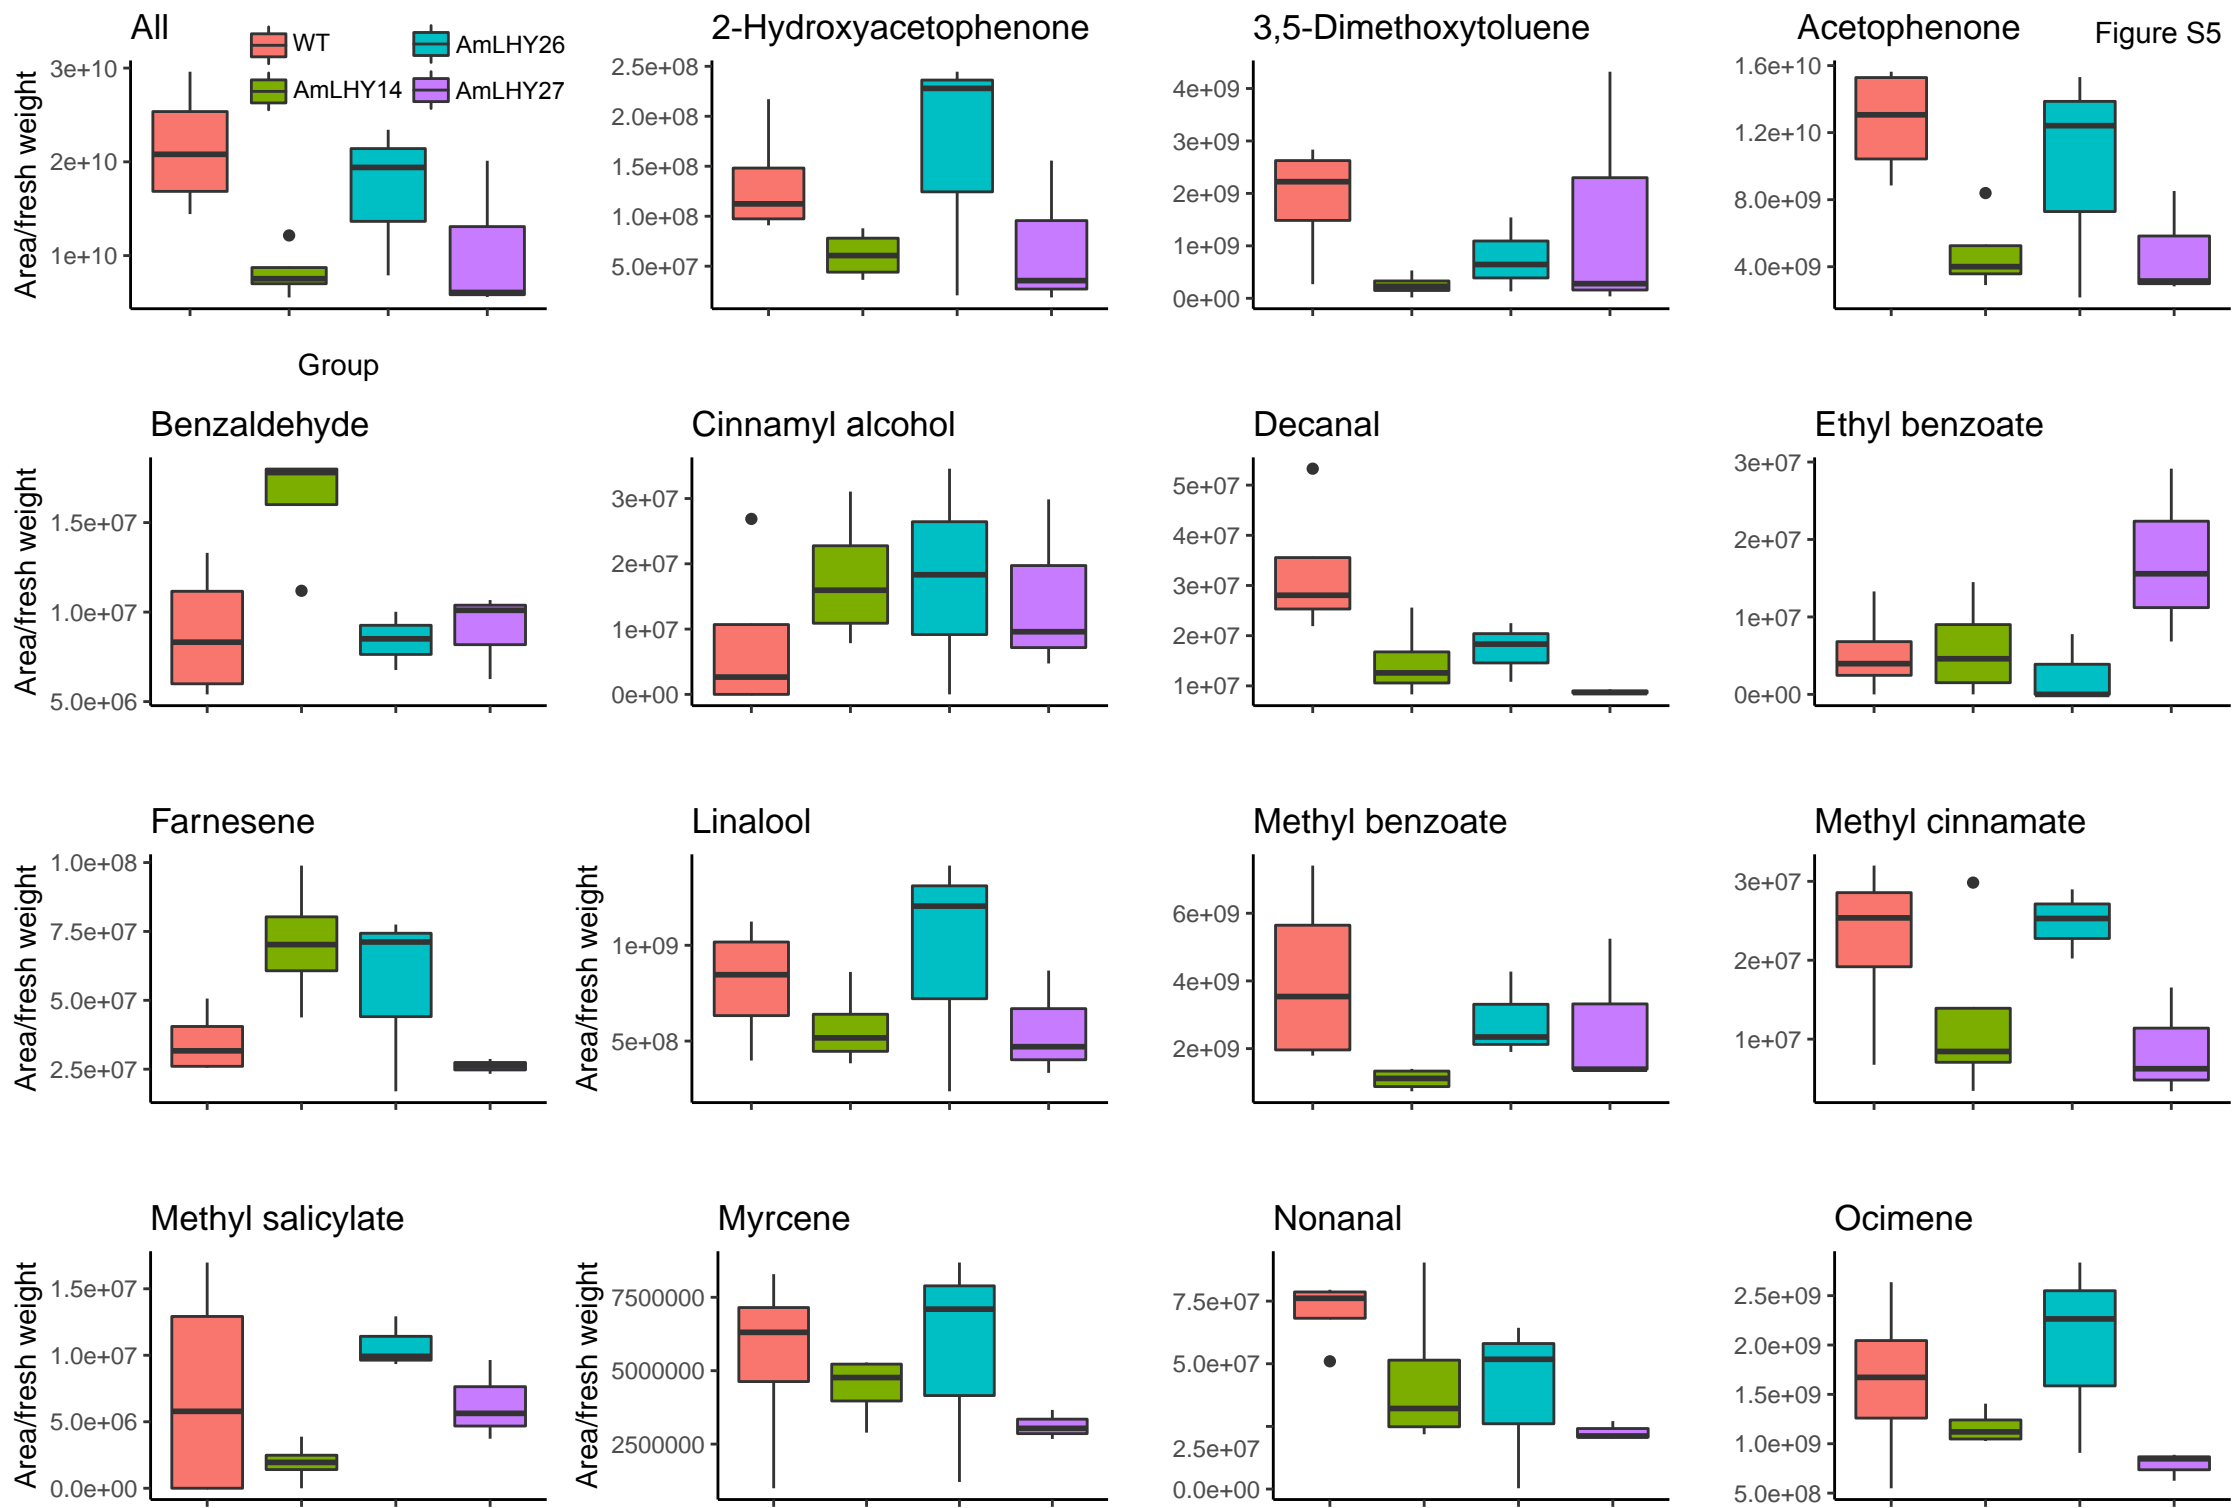

Supplementary Table S1. Accession numbers of proteins used in phylogenetic reconstruction.

| Specie                                    | Accession      | Protein                                |
|-------------------------------------------|----------------|----------------------------------------|
| <i>Arabidopsis thaliana</i> (At)          | AT1G01060      | LATE ELONGATED HYPOCOTYL (LHY)         |
|                                           | OAP07470.1     | CIRCADIAN CLOCK ASSOCIATED 1 (CCA1)    |
|                                           | OAO92169.1     | REVEILLE 1 (RVE1)                      |
|                                           | OAO90963.1     | REVEILLE 2 (RVE2)                      |
|                                           | AT1G01520      | REVEILLE 3 (RVE3)                      |
|                                           | gi 75324470    | REVEILLE 4 (RVE4)                      |
|                                           | gi 576017836   | REVEILLE 5 (RVE5)                      |
|                                           | AT5G52660      | REVEILLE 6 (RVE6)                      |
|                                           | gi 576017949   | REVEILLE 7 (RVE7)                      |
|                                           | OAP05994.1     | REVEILLE 8 (RVE8)                      |
| <i>Amborella trichopoda</i> (Amt)         | XP_006829218.1 | LATE ELONGATED HYPOCOTYL (LHY)         |
| <i>Antirrhinum majus</i> (Am)             | Am03g44570     | LATE ELONGATED HYPOCOTYL (LHY)         |
|                                           | LT978479.1     |                                        |
|                                           | Am04g07010     | REVEILLE 1A-like (RVE1A-like)          |
|                                           | Am06g21890     | REVEILLE 1B-like (RVE1B-like)          |
|                                           | Am04g18800     | REVEILLE 2A-like (RVE2A-like)          |
|                                           | Am06g21900     | REVEILLE 2B-like (RVE2B-like)          |
|                                           | Am02g37040     | REVEILLE 3/5A-like (RVE3/5A-like)      |
|                                           | Am03g44150     | REVEILLE 3/5B-like (RVE3/5B-like)      |
|                                           | Am08g25850     | REVEILLE 4/8-like (RVE4/8-like)        |
| <i>Glycine soja</i> (Gs)                  | KHN11366.1     | LATE ELONGATED HYPOCOTYL (LHY)         |
| <i>Hordeum vulgare</i> (Hv)               | AEW48245.1     | CIRCADIAN CLOCK ASSOCIATED 1 (CCA1)    |
| <i>Nicotiana attenuata</i> (Na)           | OIS99379.1     | LATE ELONGATED HYPOCOTYL (LHY)         |
| <i>Nicotiana glauca</i> (Ns)              | XP_009794791.1 | PREDICTED: protein LHY                 |
| <i>Oryza sativa</i> (Japonica Group) (Os) | XP_015649847.1 | LHY isoform X4                         |
| <i>Ostreococcus tauri</i> (Ot)            | AAU14271.1     | LHY-like protein, partial              |
| <i>Petunia hybrida</i> (Ph)               | AKL88450.1     | LATE ELONGATED HYPOCOTYL (LHY)         |
| <i>Phaseolus vulgaris</i> (Pv)            | CAD12767.2     | LATE ELONGATED HYPOCOTYL (LHY)         |
| <i>Physcomitrella patens</i> (Pp)         | BAI39991.1     | CIRCADIAN CLOCK ASSOCIATED 1A, partial |
|                                           | BAI39992.1     | CIRCADIAN CLOCK ASSOCIATED 1B, partial |
| <i>Vigna radiata</i> (Vr)                 | XP_014521593.1 | LATE ELONGATED HYPOCOTYL (LHY)         |
| <i>Vigna unguiculata</i> (Vu)             | XP_027906072.1 | LATE ELONGATED HYPOCOTYL-like (LHY)    |
| <i>Zea mays</i> (Zm)                      | NP_001131529.2 | LATE ELONGATED HYPOCOTYL (LHY)         |
|                                           | ADU60099.1     | CIRCADIAN CLOCK ASSOCIATED 1 (CCA1)    |
|                                           | AQK41466.1     | CIRCADIAN CLOCK ASSOCIATED2 (CCA2)     |

Table S2 BLAST analysis. Arabidopsis accessions (Query ID) were used to identify REVEILLE (RVE, Protein column) sequences in the snapdragon genome database (<http://bioinfo.sibs.ac.cn/Am/index.php>). RVE names were assigned based on a tree generated by simple phylogeny (EMBL-EBI, <https://www.ebi.ac.uk/>).

| Query ID     | Protein | Snapdragon accession | P identity | e value           | Assigned name |
|--------------|---------|----------------------|------------|-------------------|---------------|
| OAO92169.1   | AtRVE1  | Am04g07010           | 86.49      | 9e <sup>-23</sup> | AmRVE1/2/7A   |
|              |         | Am06g21890           | 47.15      | 5e <sup>-20</sup> | AmRVE1/2/7B   |
| OAO90963.1   | AtRVE2  | Am04g18800           | 80.56      | 2e <sup>-23</sup> | AmRVE1/2/7C   |
|              |         | Am06g21900           | 51.00      | 2e <sup>-20</sup> | AmRVE1/2/7D   |
| AT1G01520    | AtRVE3  | Am08g25850           | 76.79      | 1e <sup>-18</sup> | AmRVE4/8      |
|              |         | Am02g37040           | 88.37      | 4e <sup>-17</sup> | AmRVE3/5B     |
| gi 75324470  | AtRVE4  | Am04g07010           | 72.97      | 8e <sup>-14</sup> | AmRVE1/2/7A   |
|              |         | Am04g18800           | 70.27      | 1e <sup>-13</sup> | AmRVE1/2/7C   |
| gi 576017836 | AtRVE5  | Am03g44150           | 76.60      | 1e <sup>-15</sup> | AmRVE3/5A     |
|              |         | Am02g37040           | 79.55      | 4e <sup>-15</sup> | AmRVE3/5B     |
| AT5G52660    | AtRVE6  | Am04g07010           | 72.97      | 3e <sup>-14</sup> | AmRVE1/2/7A   |
|              |         | Am04g18800           | 70.27      | 5e <sup>-14</sup> | AmRVE1/2/7C   |
| gi 576017949 | AtRVE7  | Am04g18800           | 67.57      | 2e <sup>-21</sup> | AmRVE1/2/7C   |
|              |         | Am06g21890           | 44.86      | 6e <sup>-20</sup> | AmRVE1/2/7B   |
| OAP05994.1   | AtRVE8  | Am04g07010           | 78.38      | 2e <sup>-15</sup> | AmRVE1/2/7A   |
|              |         | Am04g18800           | 72.97      | 5e <sup>-15</sup> | AmRVE1/2/7C   |



Supplementary Table S3. PCR primers used in the current study

| Gene       | Forward (5' – 3')        | Reverse (5' – 3')         |
|------------|--------------------------|---------------------------|
| RNAi:AmLHY | TCTGGATGAAACAAGTGTCC     | TAAAAAGTTTCTGGGCATGA      |
| NPTII      | CCTGCTTGCCGAATATCATGGTGG | CGAAATCTCGTGATGGCAGGTTGG  |
| AmUBI      | CCGATGGAAGTATATGTTTG     | CCAGTCTTACAAGACCTAGAAGCTC |
| AmLHY      | TTACTTGCTCTCCGGCAACT     | TTGAAGTCACAAGCTGATTGC     |

Supplementary Table S4. Analysis of floral parameters in non-transgenic and transgenic lines. Parameters were analyzed using a Student's *t* test. *P* value < 0.05 indicates a significant difference between non-transgenic and transgenic snapdragon flowers, significance levels are indicated with one asterisks (\* for *p* < 0.05), two asterisks (\*\* for *p* < 0.001) and three asterisks (\*\*\*) for *p* < 0.0001).

| Parameter             | RNAi:AmLHY14 | RNAi:AmLHY26 | RNAi:AmLHY27 |
|-----------------------|--------------|--------------|--------------|
| Total length          | 0.037*       | 0.858        | 0.069        |
| Lower length          | 0.014*       | 0.486        | 0.210        |
| Tube width            | 0.927        | 0.927        | 0.001*       |
| Sepal length          | 0.337        | 0.646        | 0.762        |
| Petal height          | 0.000***     | 0.060        | 0.004*       |
| Lower petal expansion | 0.005*       | 0.885        | 0.885        |
| Upper petal expansion | 0.137        | 0.419        | 0.000***     |
| Tube length           | 0.404        | 0.881        | 0.404        |
| Pallate               | 0.000***     | 0.258        | 0.160        |
| Stamen length         | 0.974        | 0.974        | 0.974        |
| Gynoecium length      | 0.048*       | 0.278        | 0.278        |

Supplementary Table S5. Retention time in minutes (RT), CAS number of detected volatiles.

| RT     | CAS                  | Volatile              |
|--------|----------------------|-----------------------|
| 4.611  | 100-52-7             | Benzaldehyde          |
| 5.235  | 123-35-3             | Myrcene               |
| 6.296  | 3779-61-1            | Ocimene               |
| 7.701  | 124-19-6             | Nonanal               |
| 7.844  | 98-86-2              | Acetophenone          |
| 8.411  | 93-58-3              | Methyl benzoate       |
| 8.511  | 78-70-6              | Linalool              |
| 8.778  | 118-93-4             | 2-Hydroxyacetophenone |
| 9.387  | 119-36-8             | Methyl salicylate     |
| 9.549  | 112-31-2             | Decanal               |
| 9.839  | 93-89-0              | Ethyl benzoate        |
| 10.554 | 4179-19-5            | 3,5-Dimethoxytoluene  |
| 11.192 | 104-54-1             | Cinnamyl alcohol      |
| 12.349 | 19713-73-6, 103-26-4 | Methyl cinnamate      |
| 14.006 | 502-61-4             | Farnesene             |

Supplementary Table S6. Analysis of daily emitted volatiles with the algorithm JTK\_CYCLE in wild type (WT) and RNAi lines. Phase indicates the time point (ZT hours) with maximum emission. Shift indicates if the maximum emission of a VOC was advanced (A), delayed (D) or did not changed (NC) compared to the wild type. No data indicates that a parameter could not be determined.

|                       | WT      | RNAi:AmLHY14 |       | RNAi:AmLHY26 |       | RNAi:AmLHY27 |       |
|-----------------------|---------|--------------|-------|--------------|-------|--------------|-------|
| Volatile              | Phase   | Phase        | Shift | Phase        | Shift | Phase        | Shift |
| Myrcene               | 0       | 6            | D     | 6            | D     | 6            | D     |
| Decanal               | 3       | 3            | NC    | 3            | NC    | 3            | NC    |
| Ocimene               | 3       | 6            | D     | 6            | D     | 6            | D     |
| 2-Hydroxyacetophenone | 6       | 6            | NC    | 6            | NC    | 6            | NC    |
| 3,5-Dimethoxytoluene  | 6       | 6            | NC    | 6            | NC    | 6            | NC    |
| Linalool              | 6       | 6            | NC    | 6            | NC    | 6            | NC    |
| Nonanal               | 6       | 6            | NC    | 6            | NC    | 6            | NC    |
| Methyl cinnamate      | 6       | 3            | A     | 6            | NC    | 3            | A     |
| Cinnamyl alcohol      | 9       | 9            | NC    | 9            | NC    | 9            | NC    |
| Farnesene             | 9       | 6            | A     | 6            | A     | 6            | A     |
| Methyl benzoate       | 15      | 18           | D     | 18           | D     | 18           | D     |
| Acetophenone          | 15      | 12           | A     | 12           | A     | 12           | A     |
| Methyl salicylate     | 15      | 21           | D     | 21           | D     | 21           | D     |
| Benzaldehyde          | 18      | 12           | A     | 12           | A     | 12           | A     |
| Ethyl benzoate        | No data | No data      |       | No data      |       | No data      |       |
